# Supplementary material
Source: Springer Nature journal article supplement (https://www.springermedizin.de/resource/supplementary/12887_2014_1197_MOESM2_ESM.pdf/9476804)

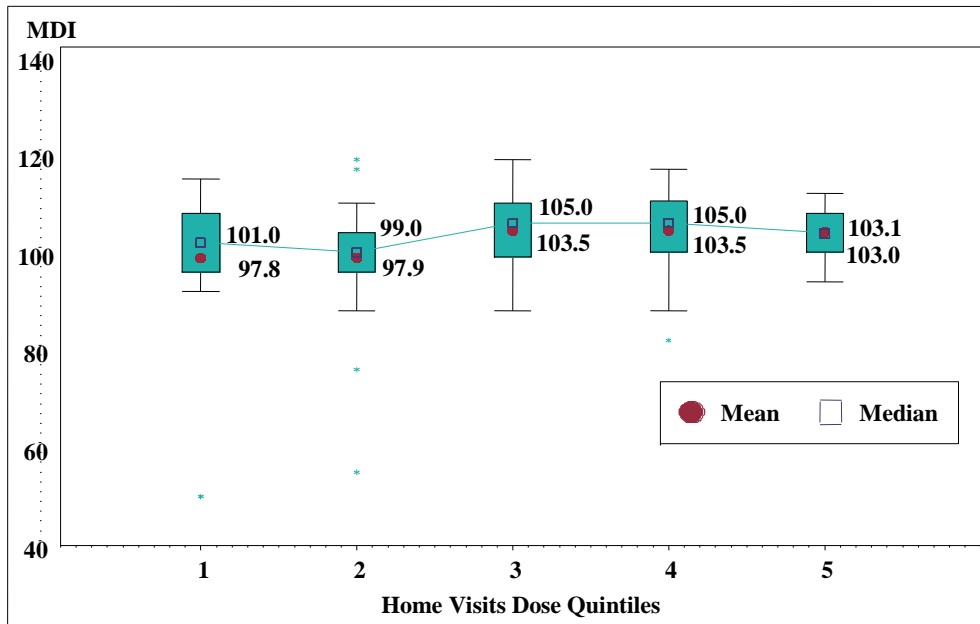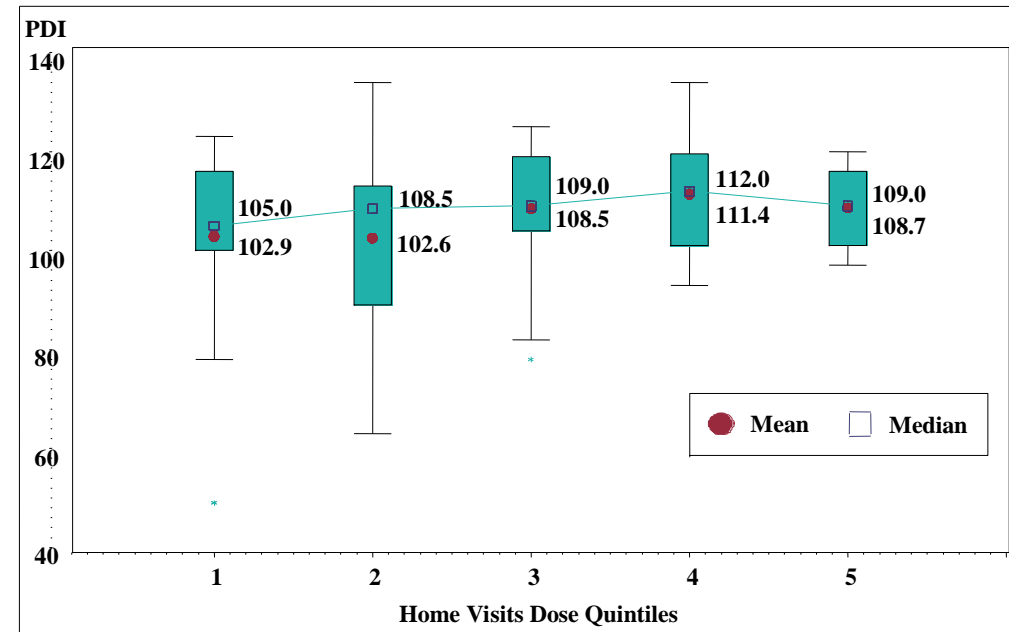

Panel C: MDI by program implementation dose quintiles

Panel D: PDI by program implementation dose quintiles

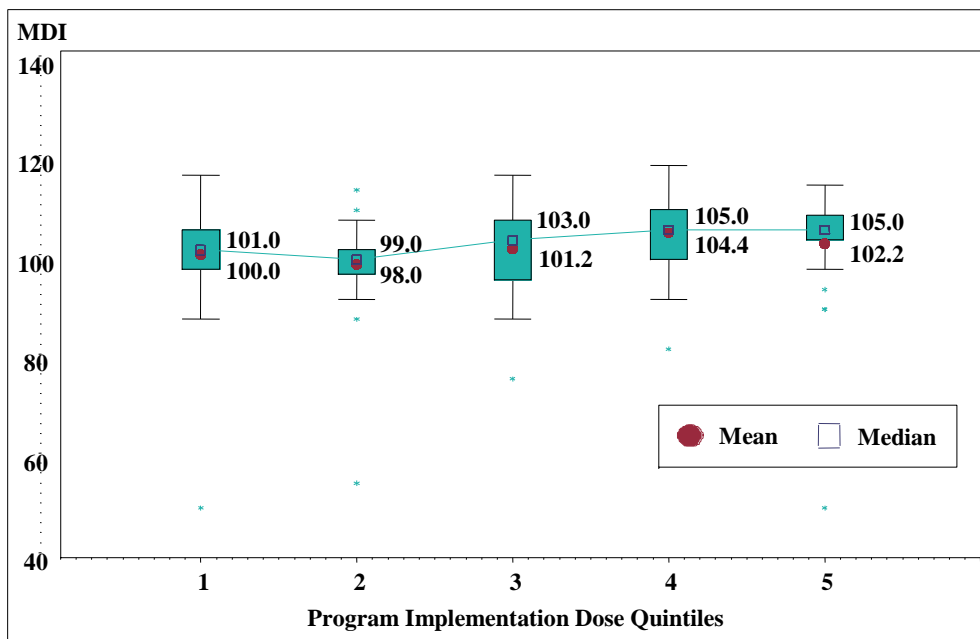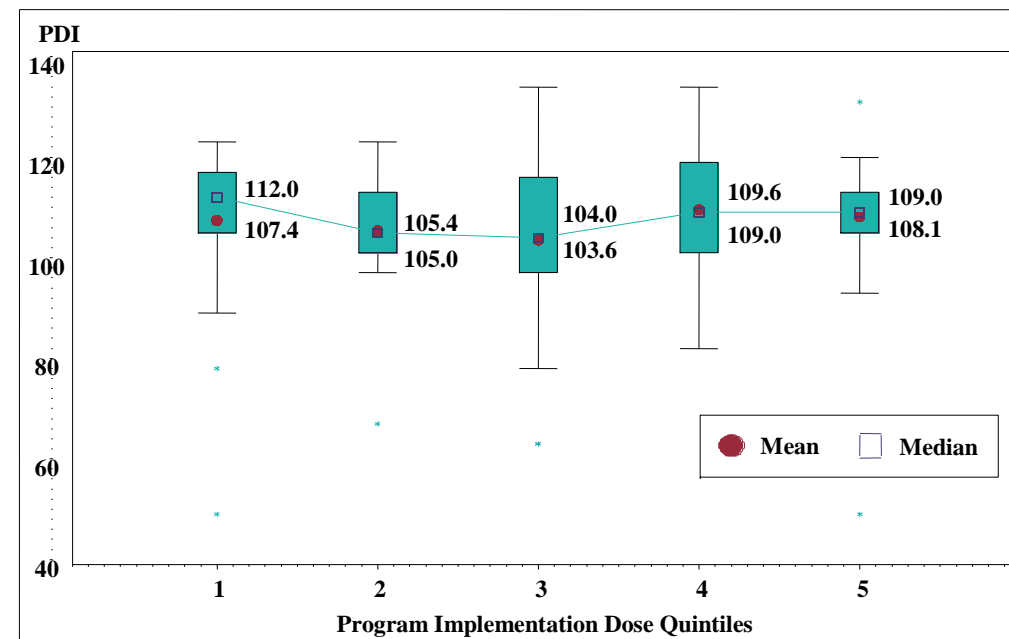

Supplement: MOESM2 [file 9476804]
